# Supplementary material for: Diagnostic accuracy of contrast-enhanced dual-energy computed tomography for detecting metastatic lymph nodes in patients with malignant tumors: a systematic review and meta-analysis
Source: PubMed Central journal article supplement — Quant Imaging Med Surg. 2023 Feb 9;13(5):3050–65. doi: 10.21037/qims-22-527 (PMC10167461; doi:10.21037/qims-22-527), 2023-02-09
Supplement: qims-13-05-3050-supplementary.pdf [file qims-13-05-3050-supplementary.pdf]

## Appendix 1

*Search strategy for PubMed*

("lymph nodes"[MeSH Terms] OR "lymph node"[Title/Abstract] OR "lymph node"[Title/Abstract] OR "nodes lymph"[Title/Abstract] OR ("lymphatic metastasis"[MeSH Terms] OR "lymphatic metastases"[Title/Abstract] OR "lymph node metastasis"[Title/Abstract] OR "lymph node metastases"[Title/Abstract] OR "metastasis lymph node"[Title/Abstract])) AND (((("dual"[All Fields] AND ("energie"[All Fields] OR "energies"[All Fields] OR "energy"[All Fields])) OR ("dual"[All Fields] AND ("energie"[All Fields] OR "energies"[All Fields] OR "energy"[All Fields]) AND ("radionuclide imaging"[MeSH Terms] OR ("radionuclide"[All Fields] AND "imaging"[All Fields]) OR "radionuclide imaging"[All Fields] OR "scanning"[All Fields] OR "scan s"[All Fields] OR "scanned"[All Fields] OR "scannings"[All Fields] OR "scans"[All Fields])) AND ("projection"[MeSH Terms] OR "forecasting"[MeSH Terms])) AND ("CT"[Title/Abstract] OR "computed tomograph\*"[Title/Abstract] OR "tomography, x-ray computed"[MeSH Terms])) OR "dect"[Title/Abstract] OR "spectral ct"[Title/Abstract])

*Search strategy for Cochrane*

Search Name:

Date Run: 01/10/2022 08:15:55

Comment:

| ID  | Search                                                                                                                                                                            | Hits  |
|-----|-----------------------------------------------------------------------------------------------------------------------------------------------------------------------------------|-------|
| #1  | MeSH descriptor: [Lymphatic Metastasis] explode all trees                                                                                                                         | 1920  |
| #2  | (Lymphatic Metastases):ti,ab,kw OR (Lymph Node Metastasis):ti,ab,kw OR (Lymph Node Metastases):ti,ab,kw OR (Metastasis, Lymph Node):ti,ab,kw (Word variations have been searched) | 5609  |
| #3  | #1or#2                                                                                                                                                                            | 6207  |
| #4  | MeSH descriptor: [Lymph Nodes] explode all trees                                                                                                                                  | 907   |
| #5  | (Lymph Node):ti,ab,kw OR (Node, Lymph):ti,ab,kw OR (Nodes, Lymph):ti,ab,kw (Word variations have been searched)                                                                   | 12965 |
| #6  | #4or#5                                                                                                                                                                            | 12971 |
| #7  | #3or#6                                                                                                                                                                            | 13707 |
| #8  | MeSH descriptor: [Tomography, Emission-Computed] explode all trees                                                                                                                | 2652  |
| #9  | (ct):ti,ab,kw OR (computed tomograph):ti,ab,kw (Word variations have been searched)                                                                                               | 81765 |
| #10 | #8or#9                                                                                                                                                                            | 83800 |
| #11 | (dual energy):ti,ab,kw (Word variations have been searched)                                                                                                                       | 6153  |
| #12 | #10and#11                                                                                                                                                                         | 828   |
| #13 | (dect):ti,ab,kw OR (spectral ct):ti,ab,kw (Word variations have been searched)                                                                                                    | 295   |
| #14 | #12or#13                                                                                                                                                                          | 1042  |
| #15 | #7and#14                                                                                                                                                                          | 3     |

*Search strategy for Embase*

## Embase Session Results

| No. | Query                                                                                                                           | Results   |
|-----|---------------------------------------------------------------------------------------------------------------------------------|-----------|
| #19 | #18 AND #10                                                                                                                     | 235       |
| #18 | #14 OR #17                                                                                                                      | 395,622   |
| #17 | #15 OR #16                                                                                                                      | 282,888   |
| #16 | 'lymph nodes':ab,ti OR 'node, lymph':ab,ti OR 'nodes, lymph':ab,ti                                                              | 168,824   |
| #15 | 'lymph node'/exp                                                                                                                | 208,033   |
| #14 | #11 OR #13                                                                                                                      | 171,888   |
| #13 | 'lymphatic metastasis':ab,ti OR 'lymphatic metastases':ab,ti OR 'lymph node metastases':ab,ti OR 'metastasis, lymph node':ab,ti | 31,605    |
| #11 | 'lymph node metastasis'/exp                                                                                                     | 165,753   |
| #10 | #4 OR #9                                                                                                                        | 15,209    |
| #9  | #3 AND #8                                                                                                                       | 14,377    |
| #8  | 'dual energy'                                                                                                                   | 59,399    |
| #4  | 'dural energy computer assisted tomography' OR 'dect' OR 'spectral ct'                                                          | 3,650     |
| #3  | #1 OR #2                                                                                                                        | 1,834,338 |
| #2  | 'ct' OR 'computer tomography\$'                                                                                                 | 1,022,897 |
| #1  | 'computer assisted tomography'/exp                                                                                              | 1,313,207 |

**Appendix 2** Specific reasons for exclusion at the full-text screening stage

| N  | First author         | Year | Title                                                                                                                                                                                        | Journal                                                           | Reasons for exclusion                                                                    |
|----|----------------------|------|----------------------------------------------------------------------------------------------------------------------------------------------------------------------------------------------|-------------------------------------------------------------------|------------------------------------------------------------------------------------------|
| 1  | Yang <i>et al.</i>   | 2022 | Radiomics profiling identifies the value of CT features for the preoperative evaluation of lymph node metastasis in papillary thyroid carcinoma                                              | <i>Diagnostics</i>                                                | Unable to extract data: unable to obtain diagnostic indicators for individual parameters |
| 2  | Xu <i>et al.</i>     | 2022 | Iodine maps from dual-energy CT to predict extrathyroidal extension and recurrence in papillary thyroid cancer based on a radiomics approach                                                 | <i>American Journal of Neuroradiology</i>                         | Wrong outcome: prediction of tumor recurrence                                            |
| 3  | Hong <i>et al.</i>   | 2022 | Value of dual-layer spectral detector CT in preoperative prediction of lymph node metastasis of gastric cancer                                                                               | <i>Zhonghua Yi Xue Za Zhi</i>                                     | Non-English language literature                                                          |
| 4  | Li <i>et al.</i>     | 2021 | Histological subtypes of solid-dominant invasive lung adenocarcinoma: differentiation using dual-energy spectral CT                                                                          | <i>Clinical Radiology</i>                                         | Wrong outcome: prediction of tumor recurrence                                            |
| 5  | Zeng <i>et al.</i>   | 2021 | Decoupling convolution network for characterizing the metastatic lymph nodes of breast cancer patients                                                                                       | <i>Medical Physics</i>                                            | Unable to extract data: unable to obtain diagnostic indicators for individual parameters |
| 6  | Zou <i>et al.</i>    | 2021 | A new prediction model for lateral cervical lymph node metastasis in patients with papillary thyroid carcinoma: based on dual-energy CT                                                      | <i>European Journal of Radiology</i>                              | Unable to extract data: unable to obtain diagnostic indicators for individual parameters |
| 7  | Zhou <i>et al.</i>   | 2021 | Radiomics from primary tumor on dual-energy CT derived iodine maps can predict cervical lymph node metastasis in papillary thyroid cancer                                                    | <i>Academic Radiology</i>                                         | Unable to extract data: unable to obtain diagnostic indicators for individual parameters |
| 8  | Wang <i>et al.</i>   | 2021 | Dual energy CT image prediction on primary tumor of lung cancer for nodal metastasis using deep learning                                                                                     | <i>Computerized Medical Imaging and Graphics</i>                  | Unable to extract data: unable to obtain diagnostic indicators for individual parameters |
| 9  | Takumi <i>et al.</i> | 2021 | Usefulness of dual-layer spectral CT in follow-up examinations: diagnosing recurrent squamous cell carcinomas in the head and neck                                                           | <i>Japanese Journal of Radiology</i>                              | Wrong outcome: prediction of tumor recurrence                                            |
| 10 | Martin <i>et al.</i> | 2021 | Prospective evaluation of the first integrated positron emission Tomography/dual-energy computed tomography system in patients with lung cancer                                              | <i>Journal of Thoracic Imaging</i>                                | Wrong outcome: not a diagnostic accuracy study                                           |
| 11 | Le <i>et al.</i>     | 2021 | CT features predictive of nodal positivity at surgery in pancreatic cancer patients following neoadjuvant therapy in the setting of dual energy CT                                           | <i>Abdominal Radiology</i>                                        | Unable to extract data: no related parameters                                            |
| 12 | Kupik <i>et al.</i>  | 2021 | A comparison study of dual-energy spectral CT and 18F-FDG PET/CT in primary tumors and lymph nodes of lung cancer                                                                            | <i>Diagn Interv Radiol</i>                                        | Wrong outcome: not a diagnostic accuracy study                                           |
| 13 | Cao <i>et al.</i>    | 2021 | Development of a nomogram combining clinical risk factors and dual-energy spectral CT parameters for the preoperative prediction of lymph node metastasis in patients with colorectal cancer | <i>Frontiers in Oncology</i>                                      | Unable to extract data: unable to obtain diagnostic indicators for individual parameters |
| 14 | Xu <i>et al.</i>     | 2021 | Integrating CT image features and quantitative dual-energy CT parameters for diagnosing metastatic lymph nodes from papillary thyroid carcinoma                                              | <i>Chinese Journal of Radiology</i>                               | Non-English language literature                                                          |
| 15 | An <i>et al.</i>     | 2021 | Deep learning radiomics of dual-energy computed tomography for predicting lymph node metastases of pancreatic ductal adenocarcinoma                                                          | <i>European Journal of Nuclear Medicine and Molecular Imaging</i> | Unable to extract data: unable to obtain diagnostic indicators for individual parameters |
| 16 | Zhou <i>et al.</i>   | 2020 | Radiomics analysis of dual-energy CT-derived iodine maps for diagnosing metastatic cervical lymph nodes in patients with papillary thyroid cancer                                            | <i>European Radiology</i>                                         | Unable to extract data: radiomics studies                                                |
| 17 | Wang <i>et al.</i>   | 2020 | Dual-energy CT in the differentiation of stage T1 nasopharyngeal carcinoma and lymphoid hyperplasia                                                                                          | <i>European Radiology</i>                                         | Unable to extract data: unable to obtain diagnostic indicators for individual parameters |
| 18 | Liu <i>et al.</i>    | 2020 | A study of radiomics parameters from dual-energy computed tomography images for lymph node metastasis evaluation in colorectal mucinous adenocarcinoma                                       | <i>Medicine</i>                                                   | Unable to extract data: unable to obtain diagnostic indicators for individual parameters |
| 19 | Li <i>et al.</i>     | 2020 | Dual-energy CT-based deep learning radiomics can improve lymph node metastasis risk prediction for gastric cancer                                                                            | <i>European Radiology</i>                                         | Unable to extract data: radiomics studies                                                |
| 20 | Kim <i>et al.</i>    | 2020 | Application of dual-energy spectral computed tomography to thoracic oncology imaging                                                                                                         | <i>Korean J Radiol</i>                                            | Nonoriginal article                                                                      |

Appendix 2 (continued)

Appendix 2 (continued)

| N  | First author           | Year | Title                                                                                                                                                              | Journal                                                      | Reasons for exclusion                                                                    |
|----|------------------------|------|--------------------------------------------------------------------------------------------------------------------------------------------------------------------|--------------------------------------------------------------|------------------------------------------------------------------------------------------|
| 21 | Yang <i>et al.</i>     | 2018 | Dual-source CT iodine concentration and Overlay value in diagnosis of different degree gastric cancer and metastatic lymph nodes                                   | <i>Chinese Journal of Medical Imaging Technology</i>         | Non-English language literature                                                          |
| 22 | Seidler <i>et al.</i>  | 2019 | Dual-Energy CT texture analysis with machine learning for the evaluation and characterization of cervical lymphadenopathy                                          | <i>Computational and Structural Biotechnology Journal</i>    | Unable to extract data: unable to obtain diagnostic indicators for individual parameters |
| 23 | Forghani <i>et al.</i> | 2019 | Head and neck squamous cell carcinoma: prediction of cervical lymph node metastasis by dual-energy CT texture analysis with machine learning                       | <i>European Radiology</i>                                    | Unable to extract data: unable to obtain diagnostic indicators for individual parameters |
| 24 | Huang <i>et al.</i>    | 2019 | Dual-energy CT iodine image for evaluation of cervical lymph node metastatic potential in papillary thyroid microcarcinoma                                         | <i>Chinese Journal of Radiology</i>                          | Non-English language literature                                                          |
| 25 | Rizzo <i>et al.</i>    | 2019 | Metastatic and non-metastatic lymph nodes: quantification and different distribution of iodine uptake assessed by dual-energy CT                                   | <i>European Radiology</i>                                    | Unable to extract data: unable to obtain diagnostic indicators for individual parameters |
| 26 | Morgan <i>et al.</i>   | 2019 | The role of dual-energy computed tomography in assessment of abdominal oncology and beyond                                                                         | <i>Radiol Clin North Am</i>                                  | Nonoriginal article                                                                      |
| 27 | Li <i>et al.</i>       | 2019 | Diagnostic accuracy of dual-energy CT-based nomograms to predict lymph node metastasis in gastric cancer                                                           | <i>European Radiology</i>                                    | Unable to extract data: unable to obtain diagnostic indicators for individual parameters |
| 28 | Zheng <i>et al.</i>    | 2017 | Dual energy CT in diagnosis of central cervical metastatic lymph nodes in patients with papillary thyroid cancer                                                   | <i>Chinese Journal of Medical Imaging Technology</i>         | Non-English language literature                                                          |
| 29 | Hokamp <i>et al.</i>   | 2018 | Verbesserte Darstellung intraspinaler Lymphome mittels virtuell-monoenergetischen Rekonstruktionen der Dual-Energy-CT                                              | <i>Rofo</i>                                                  | Non-English language literature                                                          |
| 30 | Yang <i>et al.</i>     | 2016 | GSI quantitative parameters: Preoperative diagnosis of metastasis lymph nodes in lung cancer                                                                       | <i>Chinese Journal of Lung Cancer</i>                        | Non-English language literature                                                          |
| 31 | Yang <i>et al.</i>     | 2016 | Dual source CT dual-energy imaging technology in differential diagnosis of the metastatic and reactive hyperplastic lymph nodes in patients with colorectal cancer | <i>Chinese Journal of Medical Imaging Technology</i>         | Non-English language literature                                                          |
| 32 | Yang <i>et al.</i>     | 2016 | Differentiation of malignant cervical lymphadenopathy by dual-energy CT: a preliminary analysis                                                                    | <i>Scientific reports</i>                                    | Unable to extract data: unable to obtain diagnostic indicators for individual parameters |
| 33 | Wang <i>et al.</i>     | 2015 | Application of single-source dual-energy spectral CT in differentiating lymphoma and metastatic lymph nodes in the head and neck                                   | <i>Journal: Chinese Journal of Oncology</i>                  | Non-English language literature                                                          |
| 34 | Liang <i>et al.</i>    | 2015 | A retrospective study of dual-energy CT for clinical detecting of metastatic cervical lymph nodes in laryngeal and hypopharyngeal squamous cell carcinoma          | <i>Acta Oto-Laryngologica</i>                                | Unable to extract data: unable to obtain diagnostic indicators for individual parameters |
| 35 | Fu <i>et al.</i>       | 2015 | Dual-energy virtual noncontrast imaging in diagnosis of cervical metastasis lymph nodes                                                                            | <i>Journal of Cancer Research and Therapeutics</i>           | Unable to extract data: Unable to obtain diagnostic indicators for individual parameters |
| 36 | Liu <i>et al.</i>      | 2014 | MSCT in diagnosis of non-functioning cystic neuroendocrine tumors of pancreas                                                                                      | <i>Chinese Journal of Interventional Imaging and Therapy</i> | Non-English language literature                                                          |
| 37 | Baxa <i>et al.</i>     | 2014 | Dual-phase dual-energy CT in patients with lung cancer: assessment of the additional value of iodine quantification in lymph node therapy response                 | <i>European Radiology</i>                                    | Unable to extract data: unable to obtain diagnostic indicators for individual parameters |
| 38 | Pei <i>et al.</i>      | 2013 | Evaluation of advanced gastric carcinoma with monoenergetic spectrum curve of dual-source dual-energy computed tomography                                          | <i>Chinese Medical Sciences Journal</i>                      | Nonoriginal article                                                                      |
| 39 | Wang <i>et al.</i>     | 2013 | Dual-energy CT in differential diagnosis of lymphoma and metastatic lymph nodes                                                                                    | <i>Chinese Journal of Medical Imaging Technology</i>         | Non-English language literature                                                          |

CT, computed tomography; MSCT, multislice computed tomography

### Appendix 3

**Table S1** Main findings of included studies for IC in the arterial phase

| Study ID                | Total | True positives | False positives | False negatives | True negatives | Sensitivity | Specificity |
|-------------------------|-------|----------------|-----------------|-----------------|----------------|-------------|-------------|
| Zou <i>et al.</i> 2021  | 359   | 102            | 62              | 37              | 158            | 73.63%      | 71.94%      |
| Zhuo <i>et al.</i> 2021 | 216   | 78             | 17              | 14              | 107            | 84.80%      | 86.30%      |
| Sun <i>et al.</i> 2020  | 51    | 23             | 4               | 11              | 13             | 67.80%      | 76.40%      |
| Zeng <i>et al.</i> 2019 | 156   | 36             | 29              | 16              | 75             | 68.60%      | 72.00%      |
| Li <i>et al.</i> 2016   | 40    | 16             | 7               | 4               | 13             | 80%         | 65%         |
| Kato <i>et al.</i> 2015 | 81    | 30             | 5               | 5               | 41             | 84.80%      | 88.60%      |

IC, iodine concentration.

**Table S2** Main findings of the included studies for NIC in the arterial phase

| Study ID                 | Total | True positives | False positives | False negatives | True negatives | Sensitivity | Specificity |
|--------------------------|-------|----------------|-----------------|-----------------|----------------|-------------|-------------|
| Zhuo <i>et al.</i> 2021  | 216   | 76             | 17              | 16              | 107            | 82.60%      | 86.30%      |
| Sun <i>et al.</i> 2020   | 51    | 32             | 9               | 2               | 8              | 94.10%      | 47.10%      |
| Zeng <i>et al.</i> 2019  | 156   | 38             | 27              | 14              | 77             | 72.80%      | 73.90%      |
| Yang <i>et al.</i> 2019  | 178   | 63             | 36              | 9               | 70             | 87.50%      | 66.00%      |
| He <i>et al.</i> 2019    | 212   | 112            | 3               | 12              | 85             | 90.30%      | 96.60%      |
| Zhang <i>et al.</i> 2018 | 337   | 41             | 104             | 35              | 157            | 54%         | 60.20%      |
| Li <i>et al.</i> 2016    | 40    | 15             | 5               | 5               | 15             | 75%         | 75%         |
| Liu <i>et al.</i> 2015   | 175   | 38             | 4               | 25              | 108            | 60.30%      | 96.40%      |
| Liu <i>et al.</i> 2015   | 152   | 39             | 38              | 21              | 54             | 64.40%      | 58.30%      |
| Kato <i>et al.</i> 2015  | 81    | 29             | 9               | 6               | 37             | 82.60%      | 81.00%      |

NIC, normalized iodine concentration.

**Table S3** Main findings of the included studies for slope in the arterial phase

| Study ID                 | Total | True positives | False positives | False negatives | True negatives | Sensitivity | Specificity |
|--------------------------|-------|----------------|-----------------|-----------------|----------------|-------------|-------------|
| Zhuo <i>et al.</i> 2021  | 216   | 75             | 21              | 17              | 103            | 81.50%      | 83.10%      |
| Qiu <i>et al.</i> 2021   | 150   | 67             | 23              | 17              | 43             | 80.30%      | 65.48%      |
| Zeng <i>et al.</i> 2019  | 156   | 38             | 25              | 14              | 79             | 73.80%      | 75.60%      |
| Yang <i>et al.</i> 2019  | 178   | 52             | 17              | 20              | 89             | 72.20%      | 84.00%      |
| He <i>et al.</i> 2019    | 212   | 109            | 1               | 15              | 87             | 87.90%      | 98.80%      |
| Zhang <i>et al.</i> 2018 | 337   | 46             | 78              | 30              | 183            | 60%         | 70.10%      |
| Liu <i>et al.</i> 2015   | 175   | 33             | 7               | 30              | 105            | 52.40%      | 93.80%      |

**Table S4** Main findings of the included studies for IC in the venous phase

| Study ID                 | Total | True positives | False positives | False negatives | True negatives | Sensitivity | Specificity |
|--------------------------|-------|----------------|-----------------|-----------------|----------------|-------------|-------------|
| Zhuo <i>et al.</i> 2021  | 216   | 74             | 27              | 18              | 97             | 80.40%      | 78.20%      |
| Wu <i>et al.</i> 2021    | 206   | 44             | 19              | 36              | 107            | 55.00%      | 84.90%      |
| Sun <i>et al.</i> 2020   | 51    | 27             | 3               | 7               | 14             | 79.40%      | 82.40%      |
| Zeng <i>et al.</i> 2019  | 156   | 43             | 18              | 9               | 86             | 81.90%      | 82.40%      |
| Li <i>et al.</i> 2019    | 99    | 61             | 2               | 9               | 27             | 87.10%      | 93.10%      |
| Foust <i>et al.</i> 2018 | 29    | 11             | 4               | 2               | 12             | 84.60%      | 75%         |
| Zhao <i>et al.</i> 2017  | 136   | 85             | 3               | 17              | 31             | 83.30%      | 91.20%      |
| Kato <i>et al.</i> 2015  | 81    | 30             | 5               | 5               | 41             | 87.00%      | 88.60%      |

IC, iodine concentration.

**Table S5** Main findings of the included studies for NIC in the venous phase

| Study ID                 | Total | True positives | False positives | False negatives | True negatives | Sensitivity | Specificity |
|--------------------------|-------|----------------|-----------------|-----------------|----------------|-------------|-------------|
| Zhuo <i>et al.</i> 2021  | 216   | 74             | 37              | 18              | 87             | 80.40%      | 70.20%      |
| Wu <i>et al.</i> 2021    | 206   | 50             | 18              | 30              | 108            | 62.50%      | 85.70%      |
| Sun <i>et al.</i> 2020   | 51    | 24             | 3               | 10              | 14             | 70.60%      | 82.40%      |
| Zeng <i>et al.</i> 2019  | 156   | 44             | 17              | 8               | 87             | 83.90%      | 84.10%      |
| Yang <i>et al.</i> 2019  | 178   | 60             | 29              | 12              | 77             | 83.30%      | 72.60%      |
| Li <i>et al.</i> 2019    | 99    | 68             | 7               | 2               | 22             | 97.10%      | 75.90%      |
| He <i>et al.</i> 2019    | 212   | 108            | 18              | 16              | 70             | 87.10%      | 79.50%      |
| Zhang <i>et al.</i> 2018 | 337   | 55             | 75              | 21              | 186            | 73%         | 71.30%      |
| Zhao <i>et al.</i> 2017  | 136   | 98             | 8               | 4               | 26             | 96.10%      | 76.50%      |
| Liu <i>et al.</i> 2015   | 175   | 38             | 15              | 25              | 97             | 60.30%      | 86.60%      |
| Liu <i>et al.</i> 2015   | 152   | 45             | 28              | 15              | 64             | 75.50%      | 70.00%      |
| Kato <i>et al.</i> 2015  | 81    | 31             | 6               | 4               | 40             | 89.10%      | 86.80%      |

NIC, normalized iodine concentration.

**Table S6** Main findings of the included studies for slope in the venous phase

| Study ID                 | Total | True positives | False positives | False negatives | True negatives | Sensitivity | Specificity |
|--------------------------|-------|----------------|-----------------|-----------------|----------------|-------------|-------------|
| Zhuo <i>et al.</i> 2021  | 216   | 62             | 23              | 30              | 101            | 67.40%      | 81.50%      |
| Wu <i>et al.</i> 2021    | 206   | 42             | 15              | 38              | 111            | 52.50%      | 88.10%      |
| Qiu <i>et al.</i> 2021   | 150   | 47             | 12              | 37              | 54             | 56.06%      | 82.14%      |
| Zeng <i>et al.</i> 2019  | 156   | 43             | 17              | 9               | 87             | 81.80%      | 84.10%      |
| Yang <i>et al.</i> 2019  | 178   | 49             | 25              | 23              | 81             | 68.00%      | 76.40%      |
| Li <i>et al.</i> 2019    | 99    | 64             | 4               | 6               | 25             | 91.40%      | 86.20%      |
| He <i>et al.</i> 2019    | 212   | 102            | 4               | 22              | 84             | 82.30%      | 95.50%      |
| Zhang <i>et al.</i> 2018 | 337   | 50             | 6               | 26              | 255            | 66%         | 97.70%      |
| Foust <i>et al.</i> 2018 | 29    | 12             | 8               | 1               | 8              | 92.30%      | 50%         |
| Zhao <i>et al.</i> 2017  | 136   | 90             | 6               | 12              | 28             | 88.20%      | 82.40%      |
| Liu <i>et al.</i> 2015   | 175   | 39             | 10              | 24              | 102            | 62.00%      | 91.10%      |

**Table S7** Main findings of the included studies for IC in the arterial phase combined with NIC in the arterial phase

| Study ID                | Total | True positives | False positives | False negatives | True negatives | Sensitivity | Specificity |
|-------------------------|-------|----------------|-----------------|-----------------|----------------|-------------|-------------|
| Zhuo <i>et al.</i> 2021 | 216   | 87             | 47              | 5               | 77             | 95.10%      | 62.10%      |
| Sun <i>et al.</i> 2020  | 51    | 34             | 11              | 0               | 6              | 98.70%      | 36.00%      |
| Zeng <i>et al.</i> 2019 | 156   | 28             | 9               | 24              | 95             | 91.50%      | 53.20%      |
| Li <i>et al.</i> 2016   | 40    | 19             | 10              | 1               | 10             | 95.00%      | 48.80%      |
| Kato <i>et al.</i> 2015 | 81    | 34             | 13              | 1               | 33             | 97.40%      | 71.80%      |

IC, iodine concentration; NIC, normalized iodine concentration.

**Table S8** Main findings of the included studies for NIC in the arterial phase combined with slope in the arterial phase

| Study ID                 | Total | True positives | False positives | False negatives | True negatives | Sensitivity | Specificity |
|--------------------------|-------|----------------|-----------------|-----------------|----------------|-------------|-------------|
| Zhuo <i>et al.</i> 2021  | 216   | 89             | 35              | 3               | 89             | 96.80%      | 71.70%      |
| Zeng <i>et al.</i> 2019  | 156   | 48             | 46              | 4               | 58             | 92.90%      | 55.90%      |
| Yang <i>et al.</i> 2019  | 178   | 69             | 47              | 3               | 59             | 96.50%      | 55.40%      |
| He <i>et al.</i> 2019    | 212   | 123            | 4               | 1               | 84             | 98.80%      | 95.40%      |
| Zhang <i>et al.</i> 2018 | 337   | 62             | 151             | 14              | 110            | 81.60%      | 42.20%      |
| Liu <i>et al.</i> 2015   | 175   | 51             | 11              | 12              | 101            | 81.10%      | 90.40%      |

NIC, normalized iodine concentration.

**Table S9** Main findings of the included studies for NIC in the arterial phase combined with NIC in the venous phase

| Study ID                 | Total | True positives | False positives | False negatives | True negatives | Sensitivity | Specificity |
|--------------------------|-------|----------------|-----------------|-----------------|----------------|-------------|-------------|
| Zhuo <i>et al.</i> 2021  | 216   | 89             | 49              | 3               | 75             | 96.60%      | 60.60%      |
| Sun <i>et al.</i> 2020   | 51    | 33             | 10              | 1               | 7              | 98.30%      | 38.80%      |
| Zeng <i>et al.</i> 2019  | 156   | 50             | 39              | 2               | 65             | 95.60%      | 62.10%      |
| Yang <i>et al.</i> 2019  | 178   | 71             | 55              | 1               | 51             | 98.00%      | 47.90%      |
| He <i>et al.</i> 2019    | 212   | 122            | 20              | 2               | 68             | 98.70%      | 76.80%      |
| Zhang <i>et al.</i> 2018 | 337   | 67             | 149             | 9               | 112            | 87.60%      | 42.90%      |
| Liu <i>et al.</i> 2015   | 152   | 55             | 54              | 5               | 38             | 91.30%      | 40.80%      |
| Liu <i>et al.</i> 2015   | 175   | 53             | 18              | 10              | 94             | 84.20%      | 83.50%      |
| Kato <i>et al.</i> 2015  | 81    | 34             | 14              | 1               | 32             | 98.10%      | 70.30%      |

NIC, normalized iodine concentration.

**Table S10** Main findings of the included studies for NIC in the arterial phase combined with slope in the venous phase

| Study ID                 | Total | True positives | False positives | False negatives | True negatives | Sensitivity | Specificity |
|--------------------------|-------|----------------|-----------------|-----------------|----------------|-------------|-------------|
| Zhuo <i>et al.</i> 2021  | 216   | 87             | 37              | 5               | 87             | 94.30%      | 70.30%      |
| Zeng <i>et al.</i> 2019  | 156   | 49             | 39              | 3               | 65             | 95.00%      | 62.10%      |
| Yang <i>et al.</i> 2019  | 178   | 69             | 53              | 3               | 53             | 96.00%      | 50.40%      |
| He <i>et al.</i> 2019    | 212   | 122            | 7               | 2               | 81             | 98.30%      | 92.30%      |
| Zhang <i>et al.</i> 2018 | 337   | 64             | 108             | 12              | 153            | 84.40%      | 58.80%      |
| Liu <i>et al.</i> 2015   | 175   | 53             | 14              | 10              | 98             | 84.90%      | 87.70%      |

NIC, normalized iodine concentration.

**Table S11** Main findings of the included studies for slope in the arterial phase combined with NIC in the venous phase.

| Study ID                 | Total | True positives | False positives | False negatives | True negatives | Sensitivity | Specificity |
|--------------------------|-------|----------------|-----------------|-----------------|----------------|-------------|-------------|
| Zhuo <i>et al.</i> 2021  | 216   | 89             | 52              | 3               | 72             | 96.40%      | 58.30%      |
| Zeng <i>et al.</i> 2019  | 156   | 50             | 38              | 2               | 66             | 95.80%      | 63.60%      |
| Yang <i>et al.</i> 2019  | 178   | 69             | 41              | 3               | 65             | 95.40%      | 61.00%      |
| He <i>et al.</i> 2019    | 212   | 122            | 19              | 2               | 69             | 98.40%      | 78.50%      |
| Zhang <i>et al.</i> 2018 | 337   | 68             | 130             | 8               | 131            | 89.20%      | 50.00%      |
| Liu <i>et al.</i> 2015   | 175   | 51             | 21              | 12              | 91             | 81.10%      | 81.20%      |

NIC, normalized iodine concentration.

**Table S12** Main findings of the included studies for slope in the arterial phase combined with slope in the venous phase

| Study ID                 | Total | True positives | False positives | False negatives | True negatives | Sensitivity | Specificity |
|--------------------------|-------|----------------|-----------------|-----------------|----------------|-------------|-------------|
| Zhuo <i>et al.</i> 2021  | 216   | 86             | 40              | 6               | 84             | 94.00%      | 67.70%      |
| Qiu <i>et al.</i> 2021   | 150   | 77             | 31              | 7               | 35             | 91.30%      | 53.40%      |
| Zeng <i>et al.</i> 2019  | 156   | 50             | 38              | 2               | 66             | 95.20%      | 63.40%      |
| Yang <i>et al.</i> 2019  | 178   | 66             | 38              | 6               | 68             | 91.10%      | 64.20%      |
| He <i>et al.</i> 2019    | 212   | 121            | 5               | 3               | 83             | 97.80%      | 94.30%      |
| Zhang <i>et al.</i> 2018 | 337   | 66             | 82              | 10              | 179            | 86.40%      | 68.50%      |
| Liu <i>et al.</i> 2015   | 175   | 52             | 16              | 11              | 96             | 81.90%      | 85.50%      |

**Table S13** Main findings of the included studies for IC in the venous phase combined with NIC in the venous phase.

| Study ID                | Total | True positives | False positives | False negatives | True negatives | Sensitivity | Specificity |
|-------------------------|-------|----------------|-----------------|-----------------|----------------|-------------|-------------|
| Zhuo <i>et al.</i> 2021 | 216   | 89             | 56              | 3               | 68             | 96.20%      | 54.90%      |
| Wu <i>et al.</i> 2021   | 206   | 66             | 34              | 14              | 92             | 83.10%      | 72.80%      |
| Sun <i>et al.</i> 2020  | 51    | 32             | 5               | 2               | 12             | 93.90%      | 67.90%      |
| Zeng <i>et al.</i> 2019 | 156   | 50             | 32              | 2               | 72             | 97.00%      | 69.30%      |
| Li <i>et al.</i> 2019   | 99    | 70             | 8               | 0               | 21             | 99.60%      | 70.70%      |
| Zhao <i>et al.</i> 2017 | 136   | 101            | 10              | 1               | 24             | 99.30%      | 69.80%      |
| Kato <i>et al.</i> 2015 | 81    | 35             | 11              | 0               | 35             | 98.60%      | 76.90%      |

IC, iodine concentration; NIC, normalized iodine concentration.

**Table S14** Main findings of the included studies for IC in the venous phase combined with slope in the venous phase

| Study ID                 | Total | True positives | False positives | False negatives | True negatives | Sensitivity | Specificity |
|--------------------------|-------|----------------|-----------------|-----------------|----------------|-------------|-------------|
| Zhuo <i>et al.</i> 2021  | 216   | 86             | 45              | 6               | 79             | 93.60%      | 63.70%      |
| Wu <i>et al.</i> 2021    | 206   | 63             | 32              | 17              | 94             | 78.60%      | 74.80%      |
| Zeng <i>et al.</i> 2019  | 156   | 50             | 32              | 2               | 72             | 96.70%      | 69.30%      |
| Li <i>et al.</i> 2019    | 99    | 69             | 6               | 1               | 23             | 98.90%      | 80.20%      |
| Foust <i>et al.</i> 2018 | 29    | 13             | 10              | 0               | 6              | 98.80%      | 35.00%      |
| Zhao <i>et al.</i> 2017  | 136   | 100            | 8               | 2               | 26             | 98.00%      | 75.10%      |

IC, iodine concentration.

**Table S15** Main findings of the included studies for NIC in the venous phase combined with slope in the venous phase

| Study ID                 | Total | True positives | False positives | False negatives | True negatives | Sensitivity | Specificity |
|--------------------------|-------|----------------|-----------------|-----------------|----------------|-------------|-------------|
| Zhuo <i>et al.</i> 2021  | 216   | 86             | 53              | 6               | 71             | 93.60%      | 57.00%      |
| Wu <i>et al.</i> 2021    | 206   | 66             | 29              | 14              | 97             | 82.20%      | 77.10%      |
| Zeng <i>et al.</i> 2019  | 156   | 50             | 30              | 2               | 74             | 97.00%      | 70.70%      |
| Yang <i>et al.</i> 2019  | 178   | 68             | 47              | 4               | 59             | 94.70%      | 55.50%      |
| Li <i>et al.</i> 2019    | 99    | 70             | 10              | 0               | 19             | 99.80%      | 65.40%      |
| He <i>et al.</i> 2019    | 212   | 121            | 21              | 3               | 67             | 97.70%      | 75.90%      |
| Zhang <i>et al.</i> 2018 | 337   | 69             | 79              | 7               | 182            | 90.80%      | 69.70%      |
| Zhao <i>et al.</i> 2017  | 136   | 101            | 13              | 1               | 21             | 99.50%      | 63.00%      |
| Liu <i>et al.</i> 2015   | 175   | 53             | 24              | 10              | 88             | 84.90%      | 78.80%      |

NIC, normalized iodine concentration.
